# Supplementary material for: Fabrication of a zinc oxide/alginate (ZnO/Alg) bionanocomposite for enhanced dye degradation and its optimization study
Source: Royal Society of Chemistry journal article supplement (doi:10.1039/d1ra08991a), 2022-01-01
Supplement: d1ra08991a1.pdf [file d1ra08991a1.pdf]

## Fabrication of Zinc Oxide/Alginate (ZnO/Alg) bionanocomposite for the enhanced dye degradation and its optimization study

Vasi Uddin Siddiqui<sup>1\*</sup>, Afzal Ansari<sup>1</sup>, M. Taazeem Ansari<sup>1</sup>, Md. Khursheed Akram<sup>2</sup>, and Weqar Ahmad Siddiqui<sup>1\*</sup>

<sup>1</sup>Department of Applied Sciences and Humanities, Faculty of Engineering and Technology, Jamia Millia Islamia, New Delhi-110025, India.

<sup>2</sup>Applied Sciences and Humanities Section, University Polytechnic, Faculty of Engineering and Technology, Jamia Millia Islamia, New Delhi-110025, India.

\*Corresponding authors- **Vasi Uddin Siddiqui and Weqar Ahmad Siddiqui**

Mobile phone: +91-9045083437, +91-8800710689

E-mail address: [vasi168968@st.jmi.ac.in](mailto:vasi168968@st.jmi.ac.in), [wsiddiqui@jmi.ac.in](mailto:wsiddiqui@jmi.ac.in)

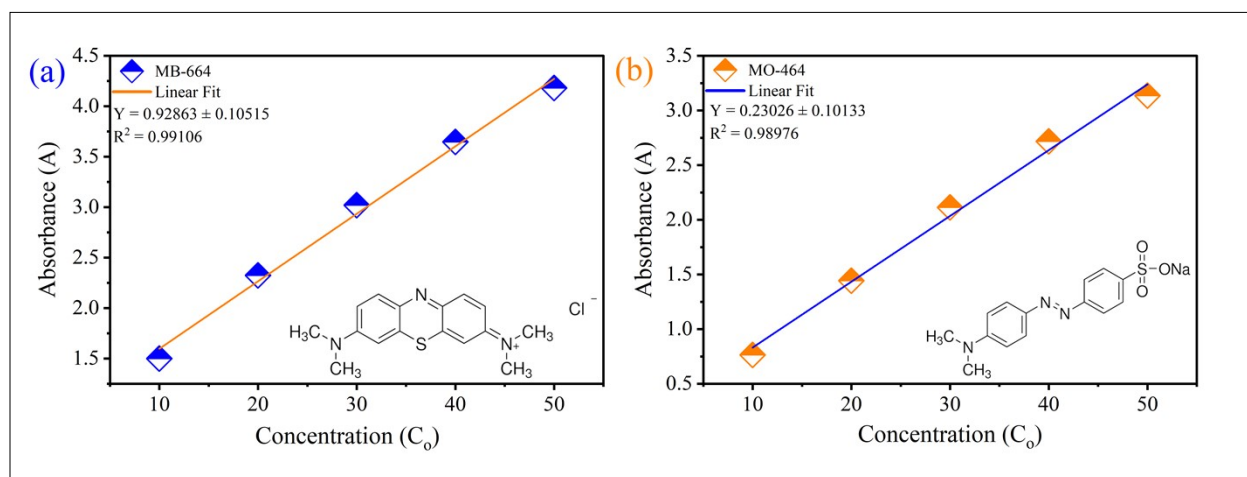

Fig. S1 Calibration curve for (a) MB and (b) MO and their molecular structure.

Table 1. Central composite design (uncoded) for MB and MO degradation (%).

| Run | Factor 1<br>A:Photocatalyst<br>dosage (mg) | Factor 2<br>B:Dye<br>concentration<br>(mgL <sup>-1</sup> ) | Factor 3<br>C:Reaction<br>time (min) | Response 1<br>MB-<br>Degradation<br>(%) | Response 2<br>MO-<br>Degradation<br>(%) |
|-----|--------------------------------------------|------------------------------------------------------------|--------------------------------------|-----------------------------------------|-----------------------------------------|
| 1   | 20.00                                      | 32.50                                                      | 80.00                                | 95.52                                   | 88.79                                   |
| 2   | 10.00                                      | 15.00                                                      | 120.00                               | 75.15                                   | 68.15                                   |
| 3   | 20.00                                      | 32.50                                                      | 80.00                                | 97.53                                   | 86.93                                   |
| 4   | 20.00                                      | 32.50                                                      | 12.72                                | 6.12                                    | 1.04                                    |
| 5   | 30.00                                      | 50.00                                                      | 120.00                               | 95.2                                    | 88.2                                    |
| 6   | 3.18                                       | 32.50                                                      | 80.00                                | 20.88                                   | 10.88                                   |
| 7   | 20.00                                      | 3.06                                                       | 80.00                                | 80.36                                   | 74.36                                   |
| 8   | 10.00                                      | 15.00                                                      | 40.00                                | 25.96                                   | 11.96                                   |
| 9   | 10.00                                      | 50.00                                                      | 40.00                                | 12.27                                   | 4.07                                    |
| 10  | 30.00                                      | 50.00                                                      | 40.00                                | 50.89                                   | 34.89                                   |
| 11  | 20.00                                      | 32.50                                                      | 80.00                                | 93.79                                   | 87.79                                   |
| 12  | 30.00                                      | 15.00                                                      | 120.00                               | 97.39                                   | 85.39                                   |
| 13  | 30.00                                      | 15.00                                                      | 40.00                                | 40.54                                   | 28.54                                   |
| 14  | 36.81                                      | 32.50                                                      | 80.00                                | 73.36                                   | 51.36                                   |
| 15  | 10.00                                      | 50.00                                                      | 120.00                               | 58.25                                   | 56.25                                   |
| 16  | 20.00                                      | 61.93                                                      | 80.00                                | 70.49                                   | 71.49                                   |
| 17  | 20.00                                      | 32.50                                                      | 147.27                               | 97.81                                   | 87.81                                   |
